# Supplementary material for: In situ synthesis of a hybrid Fe(Co)/MXene/ZSM-5 catalyst for phenol abatement
Source: Royal Society of Chemistry journal article supplement (doi:10.1039/d1nj02810c), 2021-01-01
Supplement: d1nj02810c1.pdf [file d1nj02810c1.pdf]

## In-situ synthesis of a hybrid Fe (Co)/MXene/ZSM-5 catalyst for phenol abatement

Changquan Zhang <sup>a, b</sup>, Chaolin Li <sup>a, c, \*</sup>, Gang Chen <sup>b</sup>, Fei Ji <sup>b</sup>, Yiyong Shen <sup>b</sup>, Juan  
Peng <sup>b</sup>, Jiaolong Zhang <sup>d, \*</sup>

a: Harbin Institute of Technology, Shenzhen, 518055, China.

b: Shenzhen Environmental Technology Group Co. Ltd, Shenzhen, 518049, China.

c: State Key Laboratory of Urban Water Resource and Environment, School of Environment, Harbin Institute of Technology, Harbin, 150090, China.

d: School of Materials Science and Engineering, Dongguan University of Technology, Dongguan, 518055, China.

\*: Corresponding author. [lichaoлин@hit.edu.cn](mailto:lichaoлин@hit.edu.cn); [jiaolong\\_zhang@163.com](mailto:jiaolong_zhang@163.com)

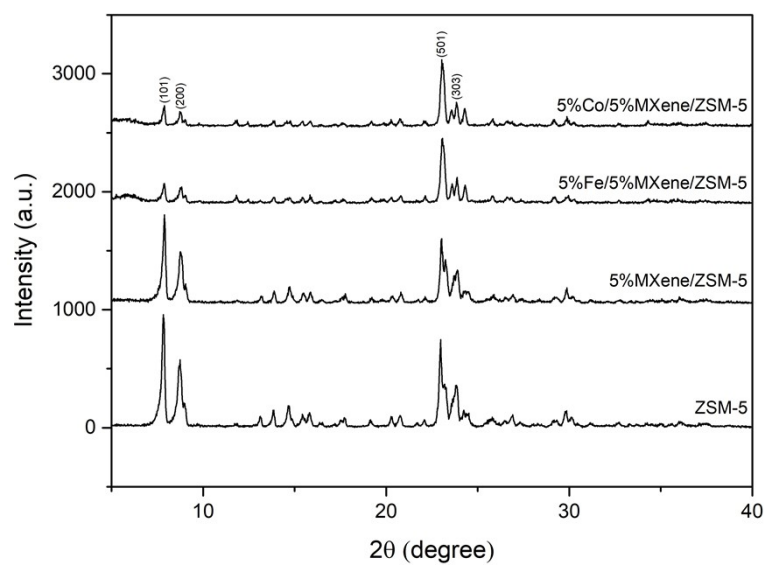

Fig. S1 The XRD patterns of ZSM-5, 5%MXene/ZSM-5, 5%Fe/5%MXene/ZSM-5 and 5%Co/5%MXene/ZSM-5.

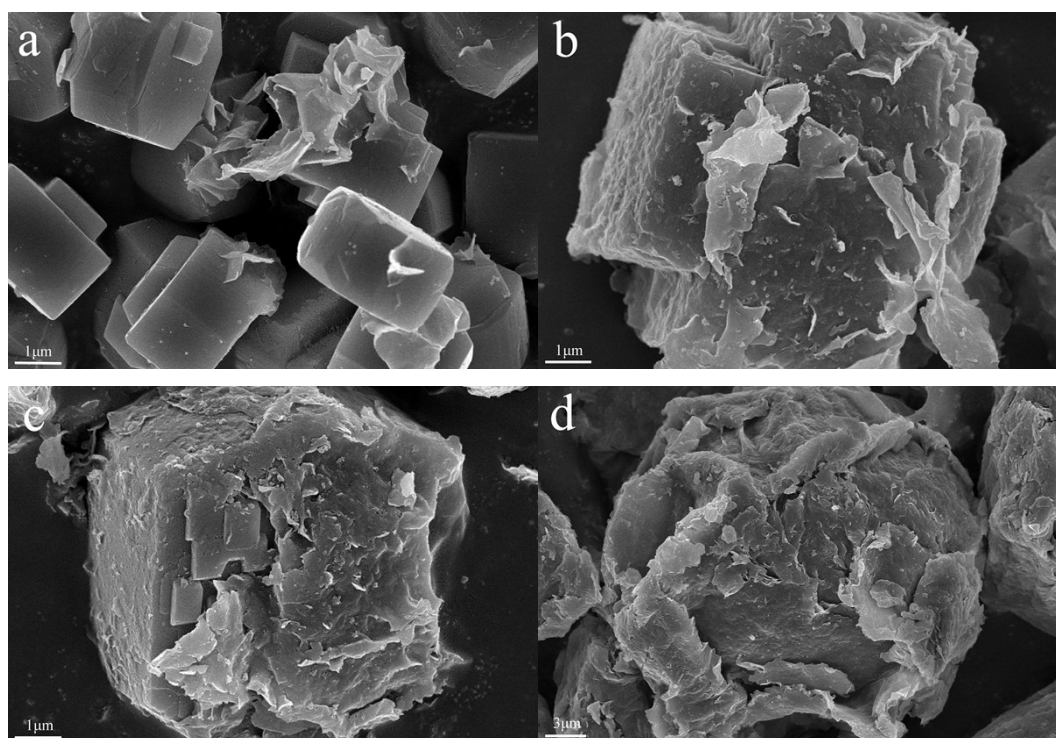

Fig. S2 The SEM images of (a) 1%MXene/ZSM-5, (b) 3%MXene/ZSM-5, (c) 5%MXene/ZSM-5 (c), and (d) 7%MXene/ZSM-5.

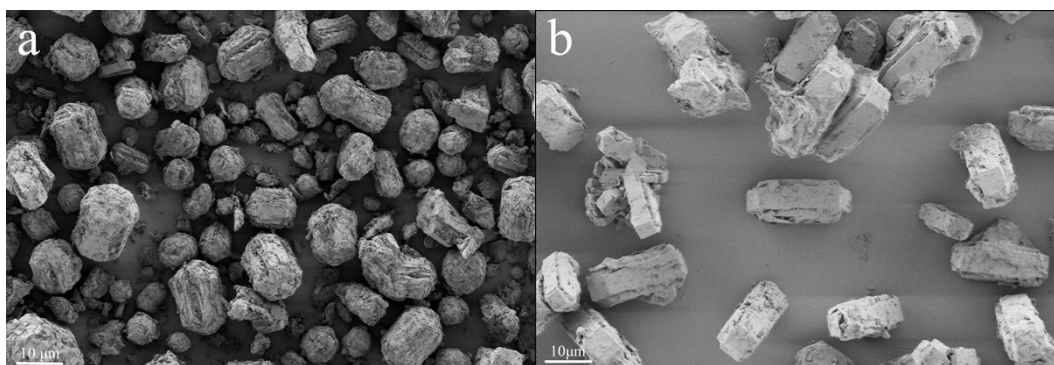

Fig. S3 The SEM images of (a) 5%Fe/5%MXene/ZSM-5, and (b) 5%Co/5%MXene/ZSM-5.

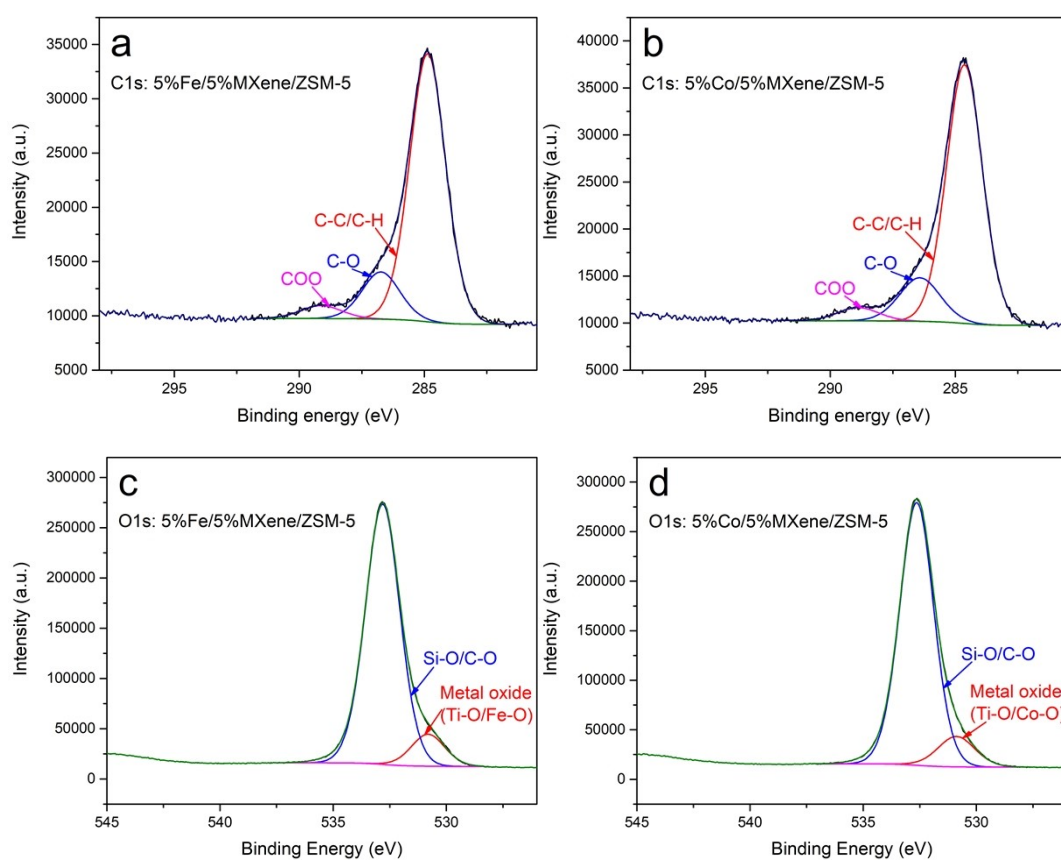

Fig. S4 (a, b) C1s spectra of 5%Fe/5%MXene/ZSM-5 and 5%Co/5%MXene/ZSM-5. (c, d) O1s spectra of 5%Fe/5%MXene/ZSM-5 and 5%Co/5%MXene/ZSM-5.

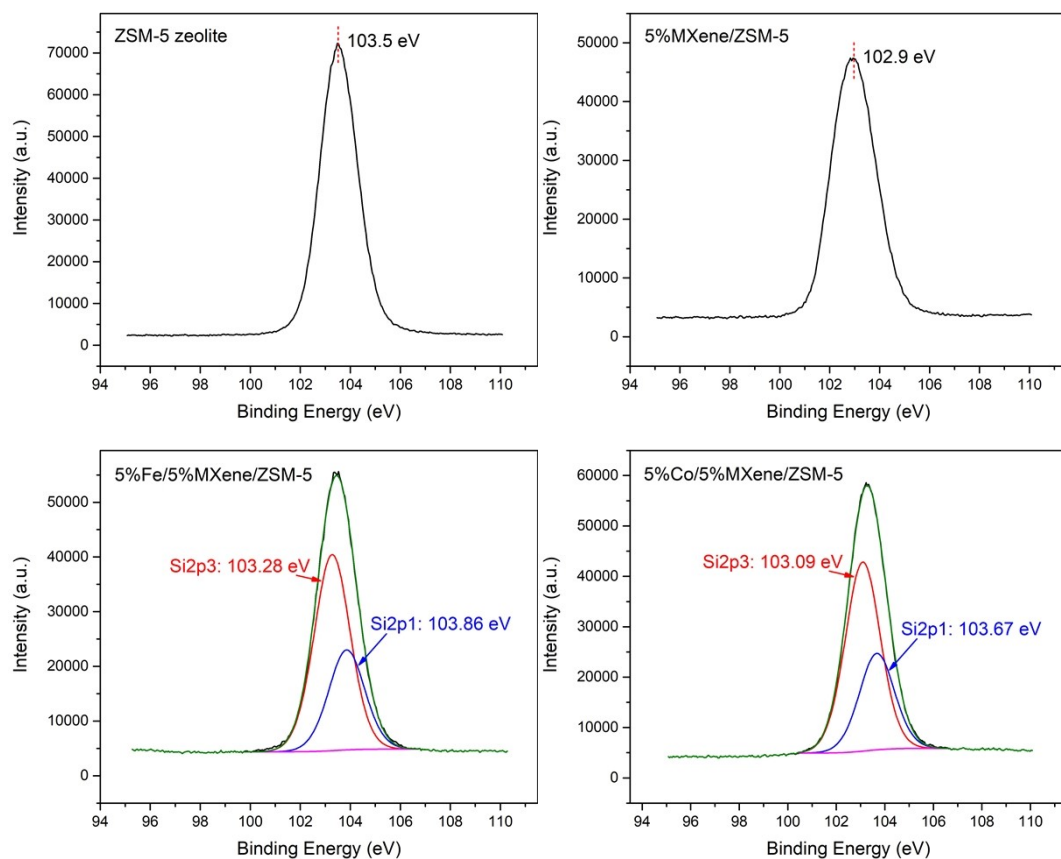

Fig. S5 The Si2p spectra of ZSM-5, 5%MXene/ZSM-5, 5%Fe/5%MXene/ZSM-5, and 5%Co/5%MXene/ZSM-5.

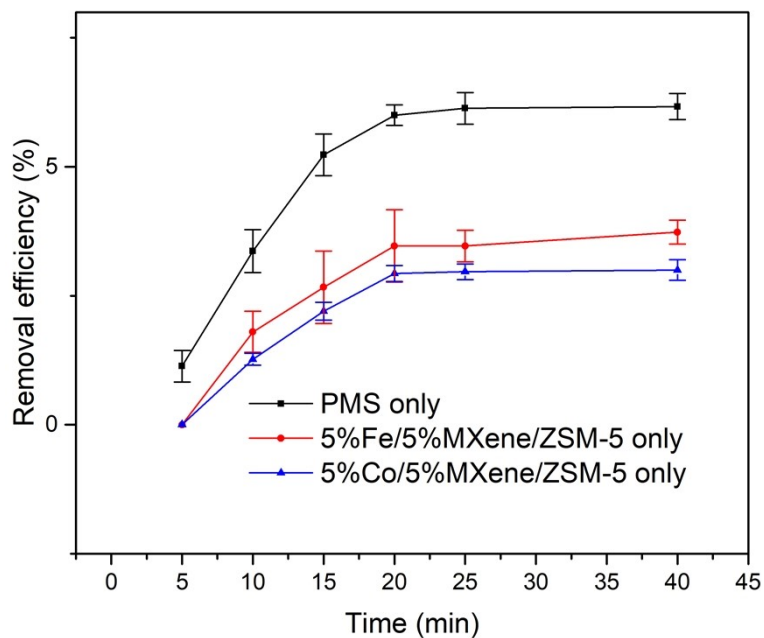

Fig. S6 The effects of PMS alone, 5%Fe/5%MXene/ZSM-5 alone, and 5%Co/5%MXene/ZSM-5 alone on the phenol removal.

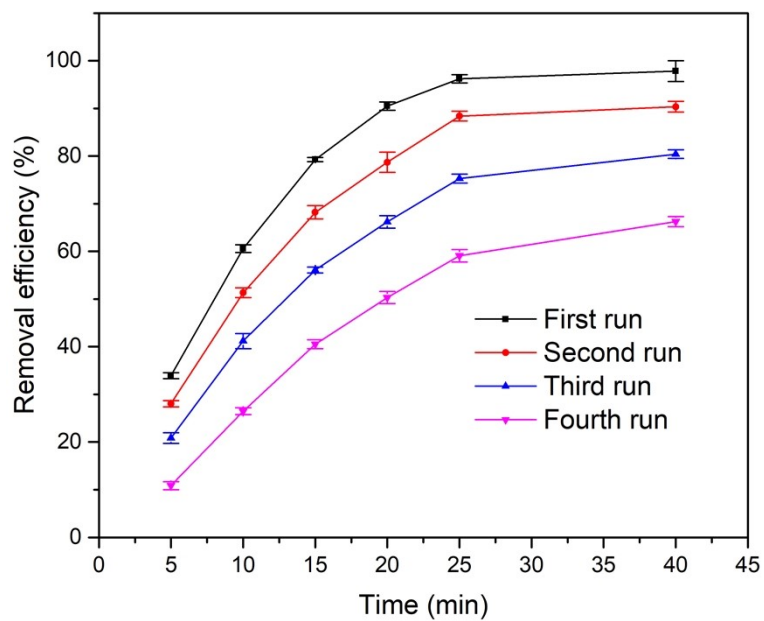

Fig. S7 Consecutive runs of the catalytic activity of 5%Fe/5%MXene/ZSM-5 on phenol removal efficiency.

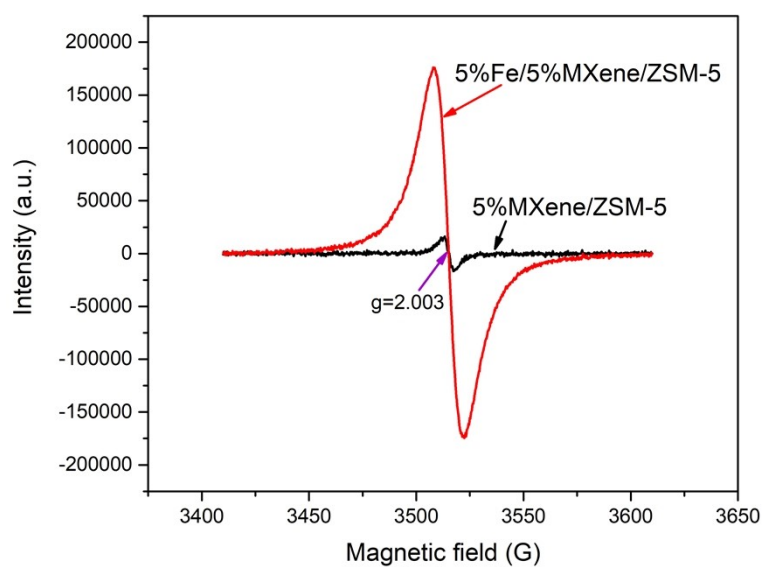

Fig. S8 EPR spectra of 5%MXene/ZSM-5 and 5%Fe/5%MXene/ZSM-5.

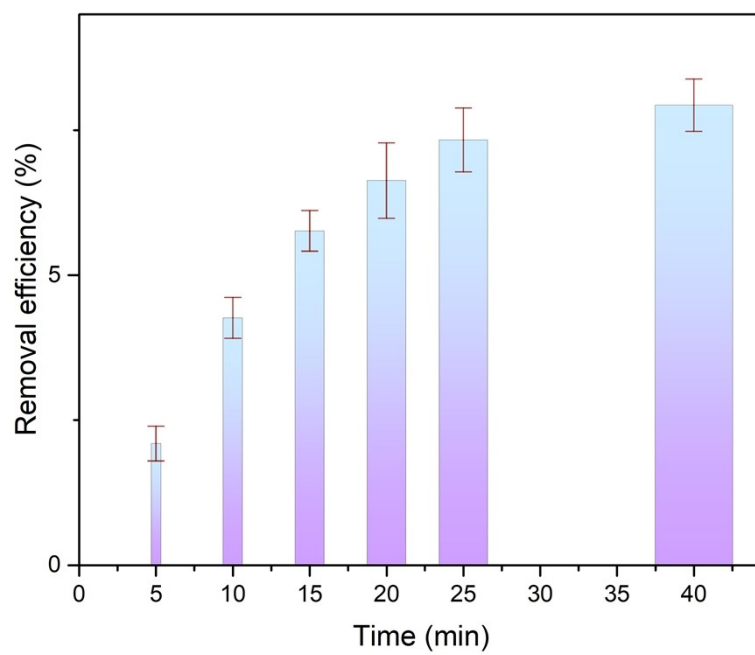

Fig. S9 The phenol removal efficiency under the dark condition.

Table S1 The binding energy peaks of metallic element in 5%Fe/5%MXene/ZSM-5 and 5%Co/5%MXene/ZSM-5.

|                    | Peak                    | Binding Energy (eV) | Chemical state          | AC%         |             |
|--------------------|-------------------------|---------------------|-------------------------|-------------|-------------|
| 5%Fe/5%MXene/ZSM-5 | Ti2p3/2                 | 459.25              | Ti(IV)                  | 100         |             |
|                    | Ti2p1/2                 | 464.95              |                         |             |             |
|                    | Fe2p3/2                 | 710.20              | Fe (II)                 | 38.79/61.21 |             |
|                    | Fe2p1/2                 | 723                 |                         |             |             |
|                    | Fe2p3/2                 | 712.2               | Fe (III)                |             |             |
|                    | Fe2p1/2                 | 725.7               |                         |             |             |
|                    | O1s-1                   | 530.81              | Metal oxide (Ti-O/Fe-O) |             | 10.68/89.32 |
|                    | O1s-2                   | 532.81              | Si-O/C-O                |             |             |
| 5%Co/5%MXene/ZSM-5 | Ti2p3/2                 | 458.89              | Ti(IV)                  | 100         |             |
|                    | Ti2p1/2                 | 464.79              |                         |             |             |
|                    | Co2p3/2                 | 781.59              | Co (II)                 | 100         |             |
|                    | Co2p3/2-multiplet split | 783.78              |                         |             |             |
|                    | sat.                    | 787.5               |                         |             |             |
|                    | sat.                    | 790.39              |                         |             |             |
|                    | O1s-1                   | 530.88              | Metal oxide (Ti-O/Co-O) | 11.17/88.83 |             |
|                    | O1s-2                   | 532.63              | Si-O/C-O                |             |             |

Table S2 The fitting straight line of the estimated band gaps by Taucs relationship.

| Sample             | Fitting linear equation   | R <sup>2</sup> | Band gap (eV) |
|--------------------|---------------------------|----------------|---------------|
| 5%MXene/ZSM-5      | $y = 7.78833x - 26.00099$ | 0.99995        | 3.34          |
| 5%Co/5%MXene/ZSM-5 | $y = 5.4442x - 13.79593$  | 0.99966        | 2.53          |
| 5%Fe/5%MXene/ZSM-5 | $y = 10.0671x - 20.33098$ | 0.99992        | 2.02          |



Table S3 Experiment conditions of the effect of pH, reaction temperature, PMS concentration and initial phenol concentration.

| Experiment | pH | Reaction temperature (K) | PMS concentration (g/L) | Initial phenol concentration (mg/L) | Time (min) |
|------------|----|--------------------------|-------------------------|-------------------------------------|------------|
| 1          | 1  | 313.15                   | 0.3                     | 20                                  | 5          |
|            | 3  |                          |                         |                                     | 10         |
|            | 5  |                          |                         |                                     | 15         |
|            | 7  |                          |                         |                                     | 20         |
|            | 9  |                          |                         |                                     | 25         |
|            | 11 |                          |                         |                                     | 40         |
| 2          | 7  | 313.15                   | 0.3                     | 20                                  | 5          |
|            |    |                          |                         |                                     | 10         |
|            |    |                          |                         |                                     | 15         |
|            |    |                          |                         |                                     | 20         |
|            |    |                          |                         |                                     | 25         |
|            |    |                          |                         |                                     | 40         |
|            |    | 303.15                   |                         |                                     | 5          |
|            |    |                          |                         |                                     | 10         |
|            |    |                          |                         |                                     | 15         |
|            |    |                          |                         |                                     | 20         |
|            |    |                          |                         |                                     | 25         |
|            |    |                          |                         |                                     | 40         |
|            |    | 323.15                   |                         |                                     | 5          |
|            |    |                          |                         |                                     | 10         |
|            |    |                          |                         |                                     | 15         |
| 20         |    |                          |                         |                                     |            |
| 25         |    |                          |                         |                                     |            |
| 40         |    |                          |                         |                                     |            |
| 3          | 7  | 313.15                   | 0.1                     | 20                                  | 5          |
|            |    |                          |                         |                                     | 10         |
|            |    |                          |                         |                                     | 15         |
|            |    |                          |                         |                                     | 20         |
|            |    |                          |                         |                                     | 25         |
|            |    |                          |                         |                                     | 40         |
|            |    |                          | 0.5                     |                                     | 5          |
|            |    |                          |                         |                                     | 10         |
|            |    |                          |                         |                                     | 15         |
|            |    |                          |                         |                                     | 20         |
|            |    |                          |                         |                                     | 25         |
|            |    |                          |                         |                                     | 40         |

|   |   |        |     |    |    |
|---|---|--------|-----|----|----|
| 4 | 7 | 313.15 | 0.3 | 10 | 5  |
|   |   |        |     |    | 10 |
|   |   |        |     |    | 15 |
|   |   |        |     |    | 20 |
|   |   |        |     |    | 25 |
|   |   |        |     |    | 40 |
|   |   |        |     | 40 | 5  |
|   |   |        |     |    | 10 |
|   |   |        |     |    | 15 |
|   |   |        |     |    | 20 |
|   |   |        |     |    | 25 |
|   |   |        |     |    | 40 |
|   |   |        |     |    | 40 |
